# Supplementary material
Source: PubMed Central journal article supplement (PMC2681308)
Supplement: 90821.2008_1.pdf [file 90821.2008_1.pdf]

**Supplementary Data**

*S1. Arterial plasma NEFA composition in C, HL, C+GN and HL+GN groups receiving TPN for 3 days before a study*

|       | C        | HL                      | C+GN      | HL+GN                    |
|-------|----------|-------------------------|-----------|--------------------------|
| 14:00 |          | 0.2±0.2                 |           | 0.1±0.1                  |
| 16:00 | 10.6±0.9 | 35.2±1.2* <sup>a</sup>  | 14.6±3.1  | 37.8±3.0* <sup>a</sup>   |
| 16:01 | 0.2±0.3  |                         | 1.4±2.0   | 0.8±0.5                  |
| 18:00 | 5.9±3.7  | 19.5±0.9* <sup>a</sup>  | 7.5±2.0   | 17.3±1.2* <sup>a</sup>   |
| 18:01 | 11.1±2.0 | 56.1±3.3* <sup>a</sup>  | 19.3±10.0 | 57.8±6.1* <sup>a</sup>   |
| 18:02 | 14.6±2.7 | 137.0±3.8* <sup>a</sup> | 24.2±5.5  | 137.5±16.3* <sup>a</sup> |
| 18:03 | 0.9±0.6  | 20.7±1.7* <sup>a</sup>  | 2.6±0.8   | 21.8±3.8* <sup>a</sup>   |
| 20:03 |          |                         |           |                          |
| 20:04 | 0.3±0.3  | 2.0±1.0                 | 1.0±1.4   | 3.0±0.8*                 |

Data are expressed as means ± SE. NEFA, nonesterified fatty acids (ug/ml).

\**P* < 0.05 compared with C. <sup>a</sup> *P* < 0.05 compared with C+GN.

*S2. Arterial plasma Triglyceride fatty acid composition in C, HL, C+GN and HL+GN groups receiving TPN for 4 days.*

|        | C          | HL         | C+GN        | HL+GN       |
|--------|------------|------------|-------------|-------------|
| 14:00  | 5.2±2.1    |            | 1.0±0.6     | 0.9±1.1     |
| 16:00  | 129.5±55.3 | 52.9±17.5  | 77.4±25.7   | 77.9±19.8   |
| 16:01  | 7.9±1.2    | 3.5±2.1    | 3.6±1.7     | 4.6±2.9     |
| 18:00  | 33.2±3.9   | 24.5±6.7   | 26.2±8.1    | 33.8±8.7    |
| 18:01  | 87.2±36.2  | 96.3±34.6  | 126.8±40.3  | 143.6±41.2  |
| 18:02  | 199.1±19.4 | 249.1±93.6 | 286.84±94.3 | 370.4±110.8 |
| 18:3w3 | 21.6±3.9   | 30.8±13.6  | 35.5±11.8   | 42.9±15.2   |
| 20:03  | 1.2±1.4    |            | 0.8±0.7     | 1.1±1.3     |
| 20:04  | 29.5±2.8   | 27.6±10.9  | 32.1±13.2   | 31.5±3.7    |
| 20:05  | 1.4±1.6    | 4.8±3.3    | 1.94±1.01   | 4.8±3.1     |
| 22:04  | 1.1±1.3    | 0.7±0.9    | 1.2±1.0     | 0.8±1.0     |
| 22:05  | 2.4±1.6    | 1.0±1.3    | 2.8±1.8     | 3.0±1.9     |

Data are expressed as means ± SE. Triglyceride (µg/ml).
